# Supplementary material for: Prevalence of atypical pathogens in patients with severe pneumonia: a systematic review and meta-analysis
Source: HighWire-hosted journal article supplement (doi:10.1136/bmjopen-2022-066721), 2023-04-01

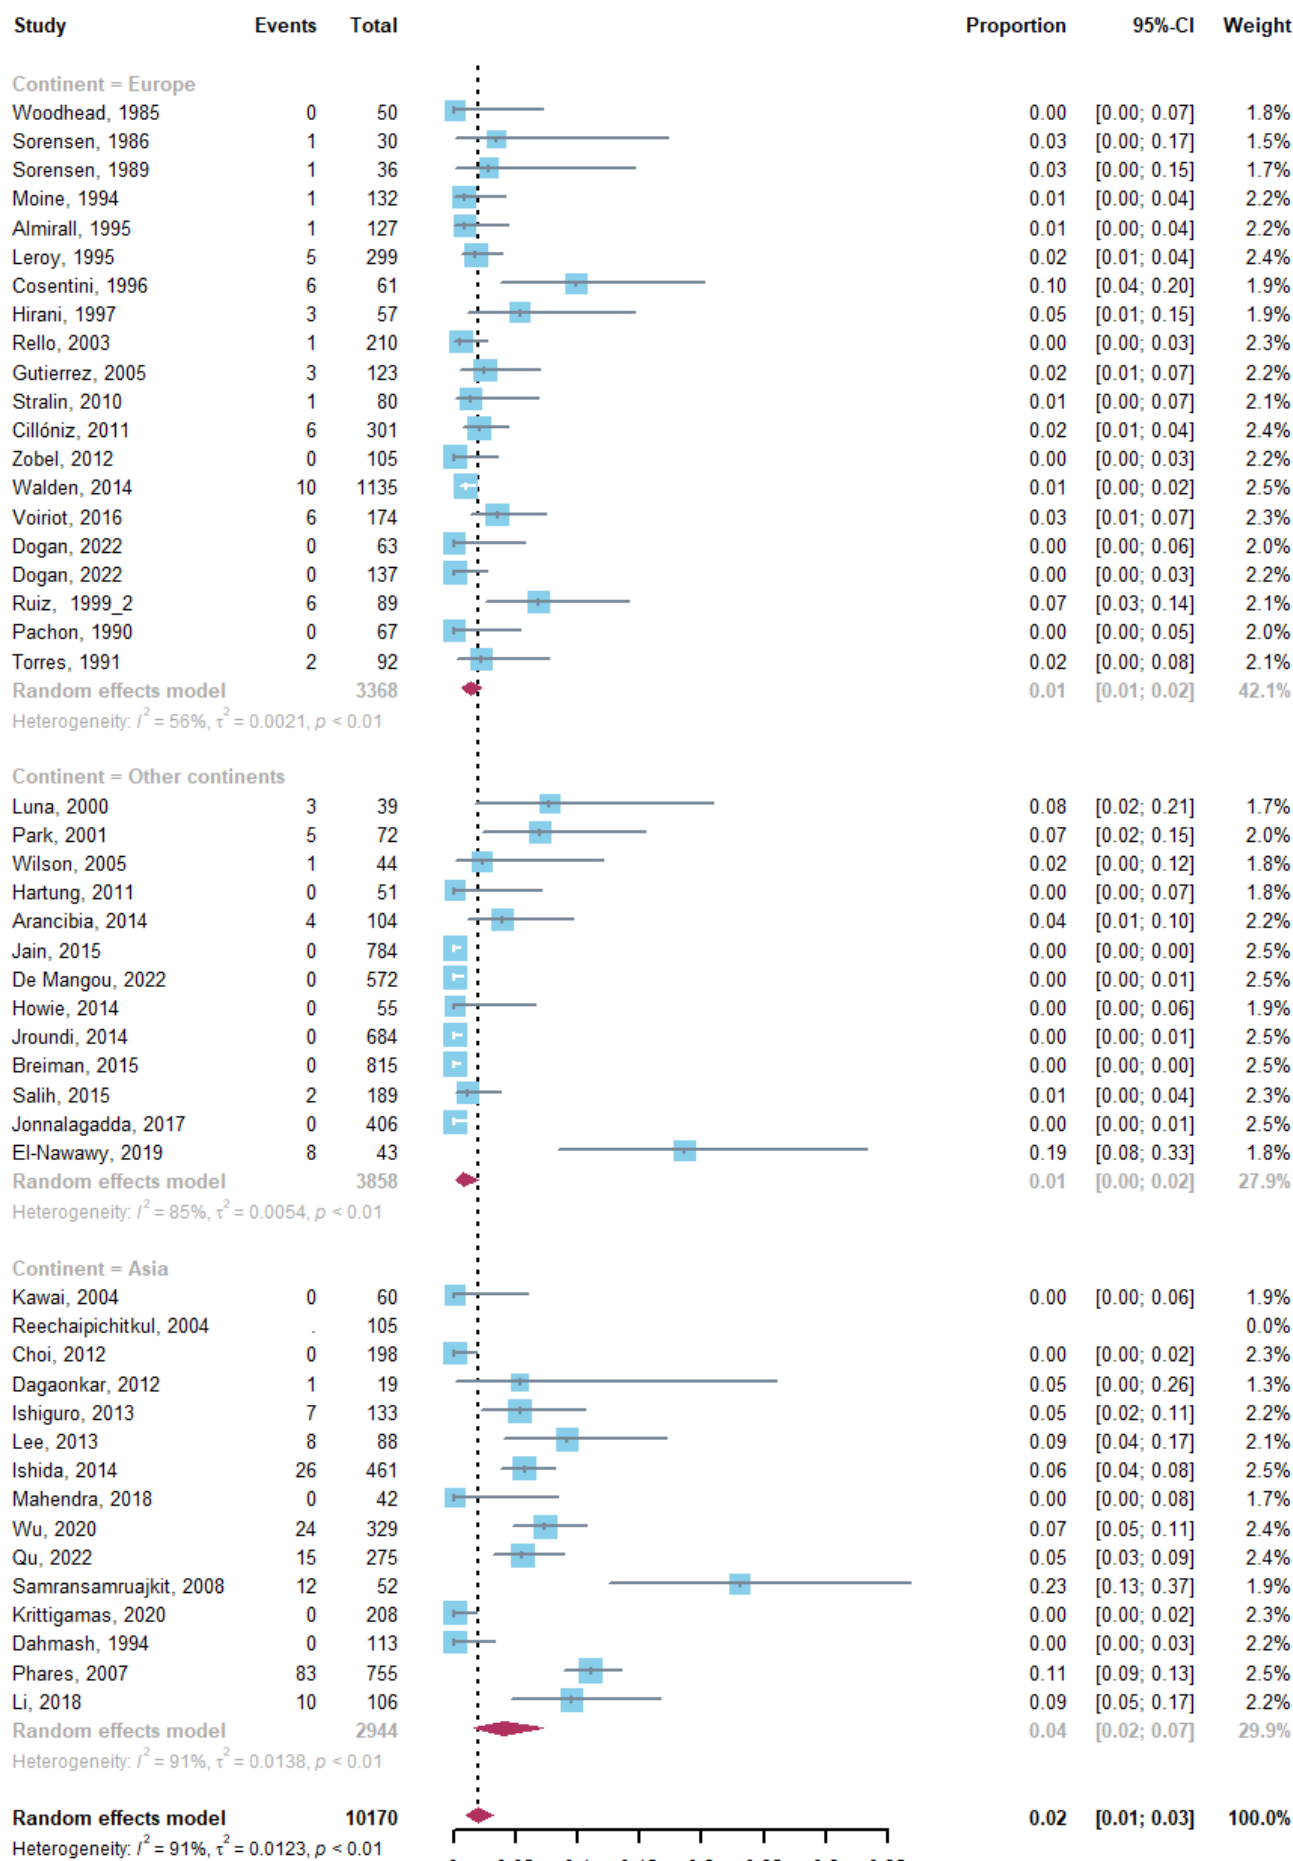

Supplement: bmjopen-2022-066721supp001_data_supplement.pdf [file bmjopen-2022-066721supp001_data_supplement.pdf]
