# Supplementary material for: Prevalence of atypical pathogens in patients with severe pneumonia: a systematic review and meta-analysis
Source: HighWire-hosted journal article supplement (doi:10.1136/bmjopen-2022-066721), 2023-04-01
Supplement: bmjopen-2022-066721supp004_data_supplement.pdf [file bmjopen-2022-066721supp004_data_supplement.pdf]

## Supplementary Material 1. Literature Search Strategies

### PubMed:

#1 (severe pneumonia [MeSH Terms]) OR (severe pneumon\*[Title/Abstract]) OR (severe community acquired pneumon\*[Title/Abstract])

#2 atypical pathogens OR atypical pneumonia OR mycoplasm\* OR Pneumonia, Mycoplasma OR legionell\* OR legionnaire\* OR Legionellosis OR Legionnaires' disease OR chlamydi\* OR chlamydia pneumonia OR chlamydia pneumoniae OR chlamydial pneumonia

#1 AND #2

### Embase:

#1 'severe pneumonia'/exp OR 'severe pneumon\*':ab,ti OR 'severe community acquired pneumon\*':ab,ti

#2 'atypical pathogen\*' OR 'atypical pneumonia\*' OR 'mycoplasm\*' OR 'pneumonia, mycoplasma' OR 'legionell\*' OR 'legionnaire\*' OR 'chlamydi\*' OR 'chlamydia pneumonia' OR 'chlamydia pneumoniae' OR 'chlamydial pneumonia'

#1 AND #2

### Web of Science:

#1 TI=(severe pneumon\*) OR AB=(severe pneumon\*) OR TI=(severe community acquired pneumon\*) OR AB=(severe community acquired pneumon\*)

#2 TS=(atypical pathogen\* OR atypical pneumon\* OR mycoplasm\* OR Pneumonia, Mycoplasma OR legionell\* OR Legionellosis OR Legionnaires' disease OR chlamydi\* OR chlamydia pneumonia OR chlamydia pneumoniae OR chlamydial pneumonia)

#1 AND #2

### The Cochrane Library:

#1 (severe pneumonia): ti,ab,kw OR (severe community acquired pneumonia):ti,ab,kw

#2 (atypical pathogen\* OR atypical pneumonia OR mycoplasm\* OR Pneumonia, Mycoplasma OR legionell\* OR legionnaire\* OR chlamydi\* OR chlamydia pneumonia OR chlamydia pneumoniae OR chlamydial pneumonia)

#1 AND #2

**Abbreviation:** MeSH, medical Subject Headings in MEDLINE.

## Supplementary Material 2

**Supplementary Table 1: Characteristics of Studies of the Prevalence of Chlamydia, Mycoplasma, and Legionella in Patients with Severe Pneumonia.**

| Study                 | Region          | Age group | Pneumonia category | Pathogen               | Total/Case | Study period    | Diagnostic method                   | Diagnostic criteria | Quality Score* |
|-----------------------|-----------------|-----------|--------------------|------------------------|------------|-----------------|-------------------------------------|---------------------|----------------|
| <b>Adults=53</b>      |                 |           |                    |                        |            |                 |                                     |                     |                |
| Woodhead et al,1985   | United Kingdom# | >14y      | CAP*               | MP, LP, CP             | 50/16      | 1972-1981       | Serology                            | Admitted to ICU     | 8              |
| Sörensen et al,1986   | Sweden          | >14y      | CAP*               | MP, LP, C.psittaci     | 30/6       | 1981-1982       | Serology, Culture                   | Admitted to ICU     | 7              |
| Sörensen et al,1989   | Sweden          | >14y      | CAP                | MP, LP, LB, C.psittaci | 36/4       | 1984-1987       | Serology, Culture                   | Admitted to ICU     | 9              |
| Potgieter et al,1992  | South Africa    | >14y      | CAP, HAP, AP, ICP  | MP, LP                 | 178/6      | 1987.01-1989.12 | Serology, Culture                   | Admitted to ICU     | 9              |
| Woodhead et al,1992   | United Kingdom# | >15y      | CAP*               | MP, LP                 | 60/11      | 1987.01-1987.12 | Serology, Culture                   | Admitted to ICU     | 10             |
| Rello et al, 1993     | Spain           | >23y      | CAP                | LP                     | 35/8       | 1988.01-1990.12 | Serology, UA                        | Admitted to ICU     | 8              |
| Moine et al,1994      | France#         | ≥15y      | CAP*               | MP, LP, C.psittaci     | 132/6      | 1987.06-1989.12 | Serology, Culture                   | Admitted to ICU     | 10             |
| Almirall et al,1995   | Spain           | Adults    | CAP, HAP           | MP, LP, C.psittaci     | 127/28     | 1986,03-1989,02 | Serology, Culture                   | Admitted to ICU     | 9              |
| Leroy et al, 1995     | France          | >17y      | CAP*               | CP, MP, LP             | 299/7      | 1987.01-1991.12 | Serology, Culture                   | Admitted to ICU     | 7              |
| Cosentini et al, 1996 | Italy           | >23y      | CAP                | MP, CP, LP             | 61/9       | 1992.07-1993.06 | Culture, indirect immunofluorescent | ATS1993             | 8              |
| Lee et al, 1996       | Singapore       | >19y      | CAP                | MP, LP                 | 59/3       | 1991.06-1993.02 | Serology, Culture                   | Admitted to ICU     | 9              |
| Hirani et al, 1997    | UK              | >15y      | CAP*               | MP, CP, LP             | 57/12      | 1984.01-1993.12 | Serology, ELISA                     | IDSA/ATS            | 7              |
| Ruiz et al-1, 1999    | Spain           | Adults    | CAP                | MP, LP                 | 64/0       | 1996.10-1997.12 | Serology, Culture                   | BTS1987             | 9              |
| Ruiz et al-2, 1999    | Spain           | Adults    | CAP*               | MP, LP, CP, C.psittaci | 89/11      | 1996.10-1998.09 | Serology, Culture, UA               | ATS1993             | 8              |
| Vegelin et al, 1999   | Netherlands     | >19y      | CAP*               | MP, LP                 | 62/3       | 1992-1996       | Culture                             | IDSA/ATS            | 6              |

|                              |              |        |           |                       |        |                      |                                      |                  |    |
|------------------------------|--------------|--------|-----------|-----------------------|--------|----------------------|--------------------------------------|------------------|----|
| Luna et al, 2000             | Argentina    | >17y   | CAP       | MP, CP, LP            | 39/7   | 1997.10-1998.09      | UA, IFA                              | IDSA/ATS         | 8  |
| Park et al, 2001             | USA          | Adults | CAP       | MP, CP, LP            | 72/11  | 1994.06-1996.05      | Serology, Culture                    | ATS1993          | 8  |
| Rello et al, 2003            | Spain#       | Adults | CAP       | MP, CP, LP            | 210/26 | 1993.01-2000.01      | Serology, Culture, UA                | ATS2001          | 8  |
| Tomic et al, 2003            | Slovenia     | >20y   | CAP       | Atypical bacteria     | 55/4   | 1998.01-1998.12      | Serology, UA                         | ATS2001          | 9  |
| Vallés et al, 2003           | Germany#     | Adults | HAP       | LP                    | 96/18  | 1993.01-2000.01      | Serology, bronchoalveolar lavage, UA | APACHE           | 8  |
| Kawai et al, 2004            | Japan        | ≥15y   | CAP       | MP, CP                | 60/1   | 1998.01-2000.12      | Serology                             | JRS2000          | 9  |
| Reechaipichitkul et al, 2004 | Thailand     | ≥15y   | CAP       | MP                    | 105/1  | 1999.01-2001.12      | Serology                             | ATS2001          | 8  |
| Diaz et al, 2005             | Chile        | > 15y  | CAP*      | MP, LP                | 113/3  | 1999-2001            | Serology, Culture, UA                | Admitted to ICU  | 8  |
| Gutierrez et al, 2005        | Spain        | >15y   | CAP       | MP, CP, LP            | 123/14 | 1999.10-2001.10      | CF test, UA                          | PSI: IV or V     | 10 |
| Templeton et al, 2005        | Netherlands# | ≥18y   | CAP       | MP                    | 28/0   | 2000.9.1-2002.9.30   | Serology, Culture, RT-PCR            | PSI: IV or V     | 9  |
| Wilson et al, 2005           | Australia    | ≥18y   | CAP       | MP, LP, CP            | 44/3   | 2001.1-2003.7        | Culture, UA, PCR                     | PSI              | 7  |
| Yang et al, 2007             | Singapore    | Adults | CAP*      | LP                    | 103/2  | over a 2-year period | /                                    | Admitted to ICU  | 7  |
| Stralin et al, 2010          | Sweden       | >18y   | CAP       | MP, CP, LP            | 80/5   | 1999.11-2002.04      | Culture, UA, PCR                     | PSI, CRB-65: 2-4 | 8  |
| Cillóniz et al, 2011         | Spain        | Adults | CAP*      | MP, LP, CP            | 301/22 | 1996.11-2008.07      | Serology, Culture, UA                | PSI: V           | 10 |
| Hartung et al, 2011          | Malawi       | > 18y  | CAP       | MP, LP, CP, C.pittaci | 51/0   | 2006.02-2006.09      | PCR, Culture                         | Admitted to ICU  | 10 |
| Choi et al, 2012             | Korea        | ≥18y   | CAP, HCAP | MP, LP, CP            | 198/5  | 2010-2011            | Culture, UA, PCR                     | IDSA/ATS2007     | 9  |
| Dagaonkar et al, 2012        | India        | Adults | CAP*      | MP, LP, CP            | 19/2   | over 18 months       | /                                    | mBTS             | 7  |
| Zobel et al, 2012            | Germany#     | >18y   | CAP*      | MP, CP, LP            | 105/21 | 2001.01-2006.12      | Culture, UA, PCR                     | CRB, CRB-65      | 9  |

|                       |               |        |                |                        |         |                 |                       |                 |    |
|-----------------------|---------------|--------|----------------|------------------------|---------|-----------------|-----------------------|-----------------|----|
| Alzubaidy et al, 2013 | France        | Adults | CAP            | MP                     | 69/7    | /               | PCR                   | Admitted to ICU | 6  |
| Ishiguro et al, 2013  | Japan         | Adults | CAP            | MP, LP, CP, C.psittaci | 133/33  | 2002.01-2011.11 | Serology, UA          | IDSA/ATS2 007   | 7  |
| Lee et al, 2013       | Taiwan, China | ≥15y   | CAP            | MP, CP, LP             | 88/15   | 2007.01-2008.12 | Serology, UA          | PSI>90          | 9  |
| Arancibia et al, 2014 | Chile#        | > 18y  | CAP*           | MP, LP, CP             | 104/19  | 2005.01-2006.06 | Culture, UA, Serology | ATS2001         | 8  |
| Ishida et al, 2014    | Japan         | > 15y  | CAP            | MP, LP, CP, C.psittaci | 461/52  | 1994.07-2012.07 | Culture, Serology, UA | IDSA/ATS2 007   | 10 |
| Valles et al, 2014    | Spain         | > 18y  | CAP, HCAP, ICP | MP, LP, CP             | 726/43  | 2011.04-2012.12 | Culture, UA, Serology | Admitted to ICU | 7  |
| Walden et al, 2014    | European #    | >18y   | CAP            | MP, CP, LP             | 1135/85 | 2005.09-2009.10 | Serology, Culture, UA | IDSA/ATS        | 9  |
| Jain et al, 2015      | USA#          | ≥18y   | CAP            | MP, CP, LP             | 784/16  | 2010.01-2012.06 | PCR, UA               | PSI: IV or V    | 10 |
| Elshamly et al, 2016  | Egypt         | Adults | CAP            | LP                     | 54/1    | 2015.8-2016.3   | Culture, UA           | IDSA/ATS2 007   | 7  |
| Voiriot et al, 2016   | France        | Adults | CAP            | MP, CP, LP             | 174/14  | 2011.10-2015.6  | mPCR                  | PSI/SAPS        | 7  |
| Gong et al, 2018      | China#        | ≥18y   | CAP            | MP, CP                 | 797/7   | since 2014      | RT-PCR                | CTS2013         | 9  |
| Mahendra et al, 2018  | India         | Adults | CAP            | LP, CP                 | 42/0    | 2015.03-2015.07 | Culture, Serology, UA | CURB-65 > 2     | 9  |
| Qin et al, 2019       | China#        | Adults | CAP            | LP                     | 286/11  | 2014-2016       | UA, Culture           | CSRD2016        | 9  |
| Xie et al, 2019       | China         | 18-85y | NR*            | LP                     | 178/4   | 2010.01-2018.06 | Culture, NGS          | IDSA/ATS        | 9  |
| Wu et al, 2020        | China#        | ≥18y   | CAP*           | LP, CP                 | 329/45  | 2018.06-2020.2  | mNGS                  | IDSA/ATS        | 8  |
| De Mangou et al, 2022 | USA           | >18y   | CAP            | MP, CP, LP             | 572/9   | 2016.01-2018.12 | UA, PCR               | ATS2019         | 8  |
| Dogan et al, 2022     | Turkey        | ≥18y   | CAP            | MP, CP, LP             | 63/4    | 2016.11-2017.10 | PCR                   | IDSA/ATS2 009   | 8  |
| Dogan et al, 2022     | Turkey        | ≥18y   | HAP            | MP, CP, LP             | 137/4   | 2016.11-2017.10 | PCR                   | IDSA/ATS2 009   | 8  |
| Guillot et al, 2022   | /             | > 18y  | CAP            | MP, CP, LP             | 856/26  | over 6 years    | UA                    | Admitted to ICU | 5  |

|                             |                               |        |          |            |         |                 |                          |                                          |    |
|-----------------------------|-------------------------------|--------|----------|------------|---------|-----------------|--------------------------|------------------------------------------|----|
| Qu et al, 2022              | China#                        | >18y   | CAP*     | MP, CP, LP | 275/62  | 2018.06-2019.12 | Culture, UA, mNGS        | Admitted to ICU                          | 8  |
| <b>Children=17</b>          |                               |        |          |            |         |                 |                          |                                          |    |
| Forgie et al,1991           | Gambia                        | 1-9y   | ALRI     | MP, CP     | 74/12   | 1987.06-1988.05 | Serology, Culture        | WHO1988                                  | 7  |
| Samransamruajkit et al,2008 | Thailand                      | 1m-15y | CAP      | MP, CP     | 52/25   | 2005-2006       | Serology                 | WHO1991                                  | 8  |
| Zhang et al, 2013           | China                         | 1m-5y  | CAP      | MP         | 707/78  | 2007.01-2010.12 | Serology, Culture, ELISA | WHO2005                                  | 8  |
| Howie et al,2014            | Gambia                        | 2-59m  | NR       | MP, LP, CP | 55/0    | 2007-2009       | Culture, PCR             | WHO                                      | 8  |
| Jroundi et al,2014          | Morocco                       | 2-59m  | NR       | MP, CP     | 684/10  | 2010.11-2011.02 | Culture, PCR             | WHO2005                                  | 8  |
| Breiman et al,2015          | Kenya                         | < 5y   | SARI     | MP, LP, CP | 815/0   | 2007.03-2011.02 | Culture, PCR             | WHO2008                                  | 10 |
| Salih et al,2015            | Sudan                         | < 5y   | NR       | MP, LP, CP | 189/6   | 2011.01-2012.06 | Culture                  | WHO2005                                  | 8  |
| Jonnalagadda et al,2017     | Ecuador                       | 2-59m  | NR       | MP, CP     | 406/3   | 2008.02-2010.04 | PCR                      | WHO                                      | 9  |
| Koh et al,2017              | Singapore                     | 1m-18y | CAP, HAP | MP         | 237/10  | 2010-2014       | Culture, Serology, PCR   | WHO2014                                  | 9  |
| Thea et al, 2017            | Southeast Asia, South Africa# | 1m-59m | CAP      | MP, CP     | 1166/38 | 2011.08-2014.01 | mPCR                     | WHO, Radiography                         | 8  |
| Gong et al, 2018            | China#                        | <18y   | CAP      | MP, CP     | 274/19  | since 2014      | RT-PCR                   | CTS2013                                  | 9  |
| El-Nawawy et al, 2019       | Egypt                         | 1m-12y | CAP*     | MP, CP     | 43/8    | 2015.05-2018.03 | IgA, ELISA               | admitted to PICU, mechanical ventilation | 9  |
| Mojtahedi et al, 2019       | Iran#                         | <18y   | HAP      | LP         | 96/19   | 2013-2014       | PCR                      | Admitted to ICU                          | 8  |
| Krittigamas et al, 2020     | Thailand                      | 1m-18y | CAP      | MP, CP, LP | 208/1   | 2017.10-2020.04 | RT-PCR                   | WHO2014                                  | 9  |
| Su et al, 2021              | China                         | <14y   | CAP      | MP         | 734/142 | 2016.01-2019.12 | Culture, PCR             | WHO                                      | 7  |
| Zhou et al, 2021            | China                         | 1m-18y | CAP      | MP         | 817/203 | 2017.01-2019.12 | Serology, PCR            | Admitted to ICU                          | 9  |
| Tran et al, 2022            | Vietnam                       | 2m-15y | CAP      | MP         | 95/8    | 2020.03-2020.08 | RT-PCR                   | WHO/BTS2013                              | 8  |

| Mix=7                                                                                                                                                                                                                                                                                                                                                                                                                                                                                                                                                                                                                                                                                                                                                                                                                                                                                                                           |              |       |          |                    |         |                 |                   |                 |    |
|---------------------------------------------------------------------------------------------------------------------------------------------------------------------------------------------------------------------------------------------------------------------------------------------------------------------------------------------------------------------------------------------------------------------------------------------------------------------------------------------------------------------------------------------------------------------------------------------------------------------------------------------------------------------------------------------------------------------------------------------------------------------------------------------------------------------------------------------------------------------------------------------------------------------------------|--------------|-------|----------|--------------------|---------|-----------------|-------------------|-----------------|----|
| Pachon et al,1990                                                                                                                                                                                                                                                                                                                                                                                                                                                                                                                                                                                                                                                                                                                                                                                                                                                                                                               | Spain        | Mix   | CAP*     | MP, LP, C.psittaci | 67/7    | 1985-1987       | Serology, Culture | Admitted to ICU | 8  |
| Torres et al,1991                                                                                                                                                                                                                                                                                                                                                                                                                                                                                                                                                                                                                                                                                                                                                                                                                                                                                                               | Spain        | Mix   | CAP*     | MP, LP, C.psittaci | 92/19   | 1984.01-1987.12 | Serology, Culture | Admitted to ICU | 7  |
| Dahmash et al,1994                                                                                                                                                                                                                                                                                                                                                                                                                                                                                                                                                                                                                                                                                                                                                                                                                                                                                                              | Saudi Arabia | > 12y | CAP, HAP | MP, LP, CP         | 113/5   | 1991.09-1992.12 | Serology, Culture | Admitted to ICU | 10 |
| Tan et al,1998                                                                                                                                                                                                                                                                                                                                                                                                                                                                                                                                                                                                                                                                                                                                                                                                                                                                                                                  | Singapore    | >12y  | CAP*     | MP, LP             | 57/6    | 1989.01-1993.05 | Serology, Culture | Admitted to ICU | 8  |
| Phares et al, 2007                                                                                                                                                                                                                                                                                                                                                                                                                                                                                                                                                                                                                                                                                                                                                                                                                                                                                                              | Thailand#    | Mix   | CAP      | MP, CP, LP, LL     | 755/130 | 2003.09-2004.08 | Serology, UA, PCR | Admitted to ICU | 7  |
| Li et al, 2018                                                                                                                                                                                                                                                                                                                                                                                                                                                                                                                                                                                                                                                                                                                                                                                                                                                                                                                  | China        | Mix   | NR       | MP, CP             | 106/26  | /               | TEM               | Admitted to ICU | 5  |
| Kübler et al, 2021                                                                                                                                                                                                                                                                                                                                                                                                                                                                                                                                                                                                                                                                                                                                                                                                                                                                                                              | New Zealand  | Mix   | NR       | LP                 | 133/8   | 2004.01-2020.08 | Culture           | VV-ECMO         | 7  |
| <p>HCAP=healthcare-associated pneumonia; ICP=Immunocompromised patient; AP=aspiration pneumonia; ICP=Immunocompromised pneumonia; ALRI=acute lower respiratory tract infections; SARI=severe acute respiratory infection; MP=Mycoplasma pneumoniae; LP=Legionella pneumophila; LB=Legionella Bozemanii; LL=Legionella longbeachae; C.psittaci=Chlamydia psittaci; CP=Chlamydia pneumoniae; IDSA=Infectious Diseases Society of America; ATS=American Thoracic Society; APACHE =Acute Physiology and Chronic Health Evaluation; mBTS=modified British Thoracic Society rule; JRS=Janpan Respiratory Society; CSR=Chinese Society of Respiratory Diseases; SAPS=Simplified Acute Physiologic Score; WHO=the World Health Organization; UA=urine antigen testing; PCR=polymerase chain reaction; NGS=next generation sequencing; NR=not reported</p> <p>* Study excludes immunocompromised patients</p> <p># multicenter study</p> |              |       |          |                    |         |                 |                   |                 |    |

**\*The citations of Diagnostic Criteria have been provided in Supplementary Table 2.**

**\* Quality assessment score: Low quality = 0–3; Moderate quality = 4–7; High quality = 8–11.**

**AHRQ Assessment Criteria: (Yes=1, No=2, Unclear=3; Answering “Yes” gets 1 score, otherwise get 0 score.)**

Q1. Define the source of information (survey, record review)

Q2. List inclusion and exclusion criteria for exposed and unexposed subjects (cases and controls) or refer to previous publications

Q3. Indicate time period used for identifying patients

Q4. Indicate whether or not subjects were consecutive if not population-based

Q5. Indicate if evaluators of subjective components of study were masked to other aspects of the status of the participants

Q6. Describe any assessments undertaken for quality assurance purposes (e.g., test/retest of primary outcome measurements)

Q7. Explain any patient exclusions from analysis

Q8. Describe how confounding was assessed and/or controlled

Q9. If applicable, explain how missing data were handled in the analysis

Q10. Summarize patient response rates and completeness of data collection

Q11. Clarify what follow-up, if any, was expected and the percentage of patients for which incomplete data or follow-up was obtained

**Supplementary Table 2. Details on the severity diagnosis of pneumonia**

| <b>Diagnostic Criteria of Severe Pneumonia</b> | <b>Number of Studies</b> |
|------------------------------------------------|--------------------------|
| <b>Admitted to ICU</b>                         | <b>26</b>                |
| <b>IDSA/ATS criteria</b>                       | <b>19</b>                |
| ATS1993                                        | 3                        |
| ATS2001                                        | 4                        |
| ATS2007                                        | 4                        |
| IDSA/ATS2009                                   | 2                        |
| IDSA/ATS2019                                   | 1                        |
| <b>WHO criteria</b>                            | <b>13</b>                |
| WHO1988                                        | 1                        |
| WHO1991                                        | 1                        |
| WHO2005                                        | 3                        |
| WHO2008                                        | 1                        |
| WHO2013                                        | 1                        |
| WHO2014                                        | 2                        |
| <b>BTS criteria (BTS1987; modified BTS)</b>    | <b>2</b>                 |
| <b>PSI score</b>                               | <b>8</b>                 |
| <b>CRB/CURB-65</b>                             | <b>3</b>                 |
| <b>APACHE</b>                                  | <b>1</b>                 |
| <b>Others: CSRD2016, CTS2013 and JRS2000</b>   | <b>3</b>                 |
| <b>Total</b>                                   | <b>75</b>                |
